# Supplementary material for: Exploring the neutral invertase–oxidative stress defence connection in Arabidopsis thaliana
Source: PubMed Central journal article supplement — J Exp Bot. 2011 Mar 25;62(11):3849–62. doi: 10.1093/jxb/err069 (PMC3134342; doi:10.1093/jxb/err069), 2011-03-25
Supplement: supp_err069_err069_Supplementary_Mateial.pdf [file supp_err069_err069_Supplementary_Mateial.pdf]

| Primer name      | Sequence                          |
|------------------|-----------------------------------|
| AtN/AlnvAFW      | GGAAGATCTATGAGCCGAATCTATCTCCTC    |
| AtN/AlnvAREV     | AAGGCCTTCGAACAAGAATCTGAGTCTTG     |
| AtN/AlnvAnREV    | AAGGCCTTGAATCCTTGGAGAAAGTGG       |
| AtN/AlnvGFW      | CGGGATCCATGGAAGGTGTTGGACTAAGAG    |
| AtN/AlnvGREV     | AAGGCCT GAGTTGTGGCCAAGACGCAG      |
| AtN/AlnvGnREV    | AAGGCCTTCTTGGTTTATCCAAAGCTC       |
| MSD1Fwqpcr       | GGAGATGCTTCCACTGTTGT              |
| MSD1Revqpcr      | ACCTCCGCCGTTGAATTTG               |
| FSD1Fwqpcr       | CAAGTGCTGTCACCGCAAAC              |
| FSD1Revqpcr      | AAAGCATCCAGTGCGAATGG              |
| CSD1Fwqpcr       | TCAACCCCGATGGTAAAACAC             |
| CSD1Revqpcr      | TCACCAGCATGTGCGATTAGCA            |
| CAT2Fwqpcr       | CTACCTTCAGCTGCCAGTCA              |
| CAT2Revqpcr      | CCCTCATGGTGGTTGTTGTG              |
| APX2Fwqpcr       | TCGGCTGGGACATTTGATGT              |
| APX2Revqpcr      | TGCCTTATCGTCCCAAACG               |
| ACTIN2Fwqpcr     | GAAGAGCACCCCTGTTCTTCT             |
| ACTIN2Revqpcr    | TGGCGTACAAGGAGAGAACA              |
| ATHXK1Fwqpcr     | GGCGATACAGTCCCATCTAA              |
| ATHXK1Revqpcr    | CGACATGTGAGGAGTCCTA               |
| ATN/AlnvAFwqpcr  | TGGCAGTTCACATTAGCATGT             |
| ATN/AlnvARevqpcr | AAGAGCCTTTTCAGCTAGCT              |
| ATN/AlnvGFwqpcr  | GGTGGTTCGCACTCGGTAA               |
| ATN/AlnvGRevqpcr | TGATCTGGAGTGGCCAATGA              |
| APX2proFw        | CGGGATCCTCTCGTCTGCTTTGGAACAC      |
| APX2proRev       | CATGCCATGGTTTTTTCAAATTCGCTTCCTTCT |
| SALK_109830LP    | TATCCACGGATGCGACTAAC              |
| SALK_109830RP    | TCAATTTAATCAGGCCTGTGC             |
| SALK_015233LP    | CGTTGCAAGAGAGAGAACCAC             |
| SALK_015233RP    | CAAAGCAGAAGGCACAAAATC             |
| SALK_095807LP    | CGCTAGACCTAGCCATTAGGG             |
| SALK_095807RP    | CAATCGACCAAATGAGTGAGG             |
| LBb1.3           | ATTTTGCCGATTTTCGGAAC              |
